# Supplementary material
Source: publisher figshare collection journal article supplement (https://frontiersin.figshare.com/ndownloader/files/14250887)
Supplement: Supplementary file 1 [file 14250887]

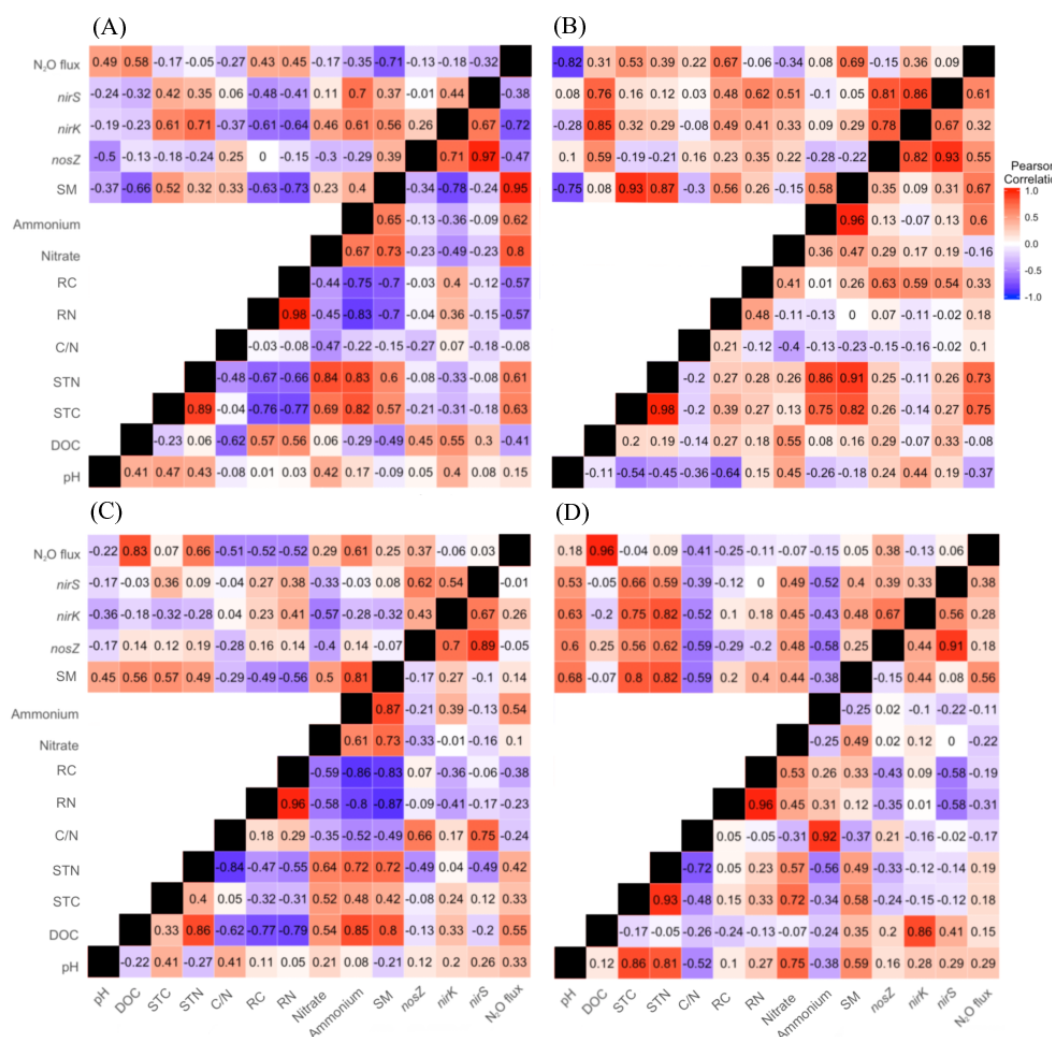

**Supplementary Figure 2.** Pearson correlations determined to evaluate the relationships between the soil chemical, physical and genetic variables. The heatmap color and text indicate the correlation coefficient. The data from the field are presented in the lower triangle, and data from the soil incubation experiment are presented in the upper triangle. The data are from the (A) Citrus; (B) Forest 1; (C) Eucalyptus; and (D) Forest 2 sites from the field (lower right-hand triangle) and incubation experiments (upper left-hand triangle). The soil moisture data were derived from field moisture (not controlled incubation moisture) for both triangles; C/N from soil total C and N.
